# Supplementary material for: Maneuvers on PCNA Rings during DNA Replication and Repair
Source: Genes (Basel). 2018 Aug 17;9(8):416. doi: 10.3390/genes9080416 (PMC6116012; doi:10.3390/genes9080416)
Supplement: Supplementary file 1 [file genes-09-00416-s001.xlsx]

## Sheet: PCNA
	1	2	3	4	5	6	7	8	9	10	11	12	13	14	15	16	17	18	19	20	21	22	23	24	25	26	27	28	29	30	31	32	33	34	35	36	37	38	39	40	41	42	43	44	45	46	47	48	49
	M	F	E	A	R	L	V	Q	G	S	I	L	K	K	V	L	E	A	L	K	D	L	I	N	E	A	C	W	D	I	S	S	S	G	V	N	L	Q	S	M	D	S	S	H	V	S	L	V	Q
Ubiquitination													21906983;26051181;23749302;27667366;23266961	21890473;23000965;25825284;23266961
Sumoylation
ISGylation
Neddylation
Acetylation													26051181;23749302;25751058;22902405	19419956
ADP-ribosylation
Phosphorylation
Methylation
[truncated: 212 more columns]

## Sheet: POLH
	1	2	3	4	5	6	7	8	9	10	11	12	13	14	15	16	17	18	19	20	21	22	23	24	25	26	27	28	29	30	31	32	33	34	35	36	37	38	39	40	41	42	43	44	45	46	47	48	49
	M	A	T	G	Q	D	R	V	V	A	L	V	D	M	D	C	F	F	V	Q	V	E	Q	R	Q	N	P	H	L	R	N	K	P	C	A	V	V	Q	Y	K	S	W	K	G	G	G	I	I	A
Ubiquitination																																23266961								26051181
Sumoylation
ISGylation
Neddylation
Acetylation
ADP-ribosylation
Phosphorylation
Methylation
[truncated: 664 more columns]

## Sheet: POLI
	1	2	3	4	5	6	7	8	9	10	11	12	13	14	15	16	17	18	19	20	21	22	23	24	25	26	27	28	29	30	31	32	33	34	35	36	37	38	39	40	41	42	43	44	45	46	47	48	49
	M	E	K	L	G	V	E	P	E	E	E	G	G	G	D	D	D	E	E	D	A	E	A	W	A	M	E	L	A	D	V	G	A	A	A	S	S	Q	G	V	H	D	Q	V	L	P	T	P	N
Ubiquitination
Sumoylation
ISGylation
Neddylation
Acetylation
ADP-ribosylation
Phosphorylation
Methylation
[truncated: 691 more columns]

## Sheet: POLK
	1	2	3	4	5	6	7	8	9	10	11	12	13	14	15	16	17	18	19	20	21	22	23	24	25	26	27	28	29	30	31	32	33	34	35	36	37	38	39	40	41	42	43	44	45	46	47	48	49
	M	D	S	T	K	E	K	C	D	S	Y	K	D	D	L	L	L	R	M	G	L	N	D	N	K	A	G	M	E	G	L	D	K	E	K	I	N	K	I	I	M	E	A	T	K	G	S	R	F
Ubiquitination																																						23266961							23266961
Sumoylation					28112733							28112733													28112733;25218447													28112733							28112733
ISGylation
Neddylation
Acetylation
ADP-ribosylation
Phosphorylation
Methylation
[truncated: 821 more columns]

## Sheet: PARG
	1	2	3	4	5	6	7	8	9	10	11	12	13	14	15	16	17	18	19	20	21	22	23	24	25	26	27	28	29	30	31	32	33	34	35	36	37	38	39	40	41	42	43	44	45	46	47	48	49
	M	N	A	G	P	G	C	E	P	C	T	K	R	P	R	W	G	A	A	T	T	S	P	A	A	S	D	A	R	S	F	P	S	R	Q	R	R	V	L	D	P	K	D	A	H	V	Q	F	R
Ubiquitination
Sumoylation																	28112733
ISGylation
Neddylation
Acetylation																																										28934471
ADP-ribosylation
Phosphorylation																						28934471;23186163
Methylation
[truncated: 927 more columns]

## Sheet: FEN1
	1	2	3	4	5	6	7	8	9	10	11	12	13	14	15	16	17	18	19	20	21	22	23	24	25	26	27	28	29	30	31	32	33	34	35	36	37	38	39	40	41	42	43	44	45	46	47	48	49
	M	G	I	Q	G	L	A	K	L	I	A	D	V	A	P	S	A	I	R	E	N	D	I	K	S	Y	F	G	R	K	V	A	I	D	A	S	M	S	I	Y	Q	F	L	I	A	V	R	Q	G
Ubiquitination								23266961																23749302;27667366;23266961
Sumoylation								28112733																28112733;25218447;25391492;24782567;28098164
ISGylation
Neddylation
Acetylation
ADP-ribosylation
Phosphorylation																23186163
Methylation																			20729856
[truncated: 331 more columns]

## Sheet: POLD3
	1	2	3	4	5	6	7	8	9	10	11	12	13	14	15	16	17	18	19	20	21	22	23	24	25	26	27	28	29	30	31	32	33	34	35	36	37	38	39	40	41	42	43	44	45	46	47	48	49
	M	A	D	Q	L	Y	L	E	N	I	D	E	F	V	T	D	Q	N	K	I	V	T	Y	K	W	L	S	Y	T	L	G	V	H	V	N	Q	A	K	Q	M	L	Y	D	Y	V	E	R	K	R
Ubiquitination
Sumoylation
ISGylation
Neddylation
Acetylation
ADP-ribosylation
Phosphorylation
Methylation
[truncated: 417 more columns]

## Sheet: CDKN1A (p21)
	1	2	3	4	5	6	7	8	9	10	11	12	13	14	15	16	17	18	19	20	21	22	23	24	25	26	27	28	29	30	31	32	33	34	35	36	37	38	39	40	41	42	43	44	45	46	47	48	49
	M	S	E	P	A	G	D	V	R	Q	N	P	C	G	S	K	A	C	R	R	L	F	G	P	V	D	S	E	Q	L	S	R	D	C	D	A	L	M	A	G	C	I	Q	E	A	R	E	R	W
Ubiquitination
Sumoylation																28112733
ISGylation
Neddylation
Acetylation
ADP-ribosylation
Phosphorylation																															25850435
Methylation
[truncated: 115 more columns]
